# Supplementary material for: Health–environment efficiency of diets shows nonlinear trends over 1990–2011
Source: Springer Nature journal article supplement (doi:10.1038/s43016-024-00924-z), 2024-02-08
Supplement: MOESM1 [file 43016_2024_924_MOESM1_ESM.pdf]

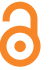

---

# Health–environment efficiency of diets shows nonlinear trends over 1990–2011

---

In the format provided by the authors and unedited

|                                                                                                                                |   |
|--------------------------------------------------------------------------------------------------------------------------------|---|
| <b>Table of Supplementary Figures</b> Figure S1 CV statistics of the ten-fold cross validation for the spline regression. .... | 2 |
| Figure S2 The temporal change of per capita food supply in selected countries.....                                             | 2 |

**Table of Supplementary Tables**

|                                                                                                          |   |
|----------------------------------------------------------------------------------------------------------|---|
| Table S1 Regression results of the health-environment efficiency on SDI, GHG emissions .....             | 3 |
| Table S2 Regression results of the health-environment efficiency on SDI, water withdrawal.....           | 3 |
| Table S3 Regression results of the health-environment efficiency on SDI, acidifying emissions .....      | 4 |
| Table S4 Regression results of the health-environment efficiency on SDI, eutrophying emissions .....     | 4 |
| Table S5 Regression results of the health-environment efficiency on lagged SDI, GHG emissions .....      | 5 |
| Table S6 Regression results of the health-environment efficiency on lagged SDI, water withdrawal .....   | 6 |
| Table S7 Regression results of the health-environment efficiency on lagged SDI, acidifying emissions.... | 6 |
| Table S8 Regression results of the health-environment efficiency on lagged SDI, eutrophying emissions.   | 7 |
| Table S9 Results of spline regression with 2 splines .....                                               | 7 |

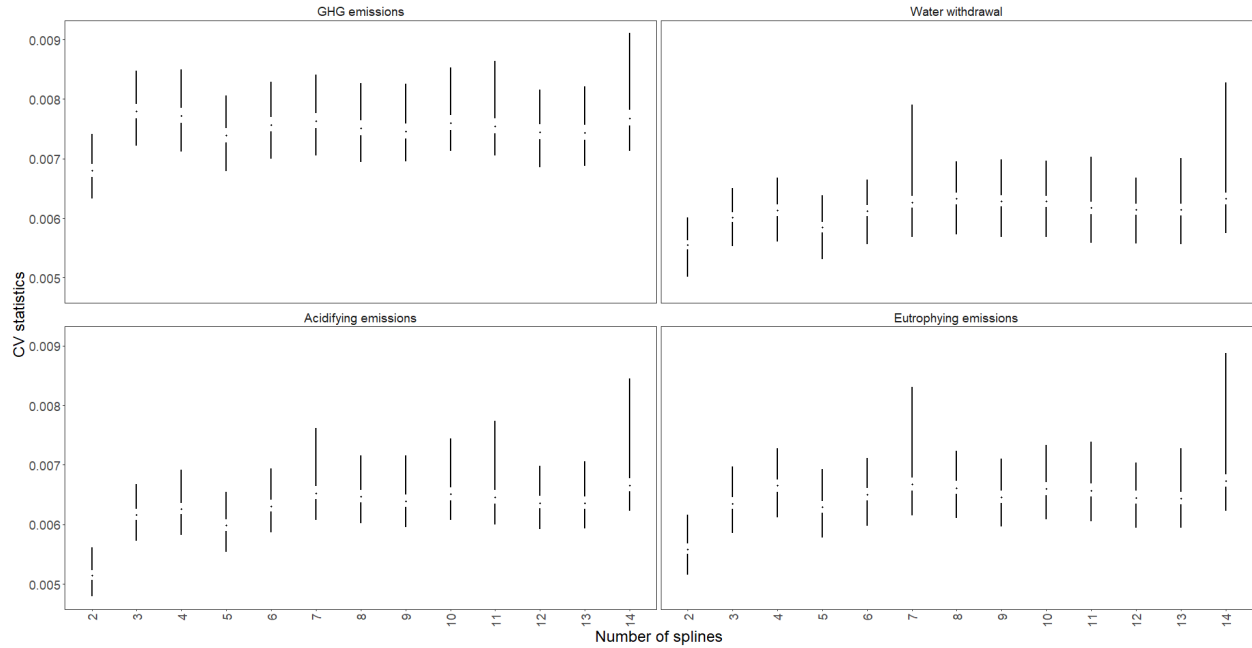

**Figure S1** Tufte's Box Plot for CV statistics of the ten-fold cross validation for the spline regression. a) GHG emissions, b) Water withdrawal, c) Acidifying emissions, d) Eutroifying emissions. Linear splines are adopted without penalty. For each number of splines, 1000 trials are run for splitting the sample into ten folds. The central box denotes the interquartile range (IQR), the lower and upper edges representing the first (Q1) and third (Q3) quartiles, and the understated whiskers extend to the 10th and 90th percentiles, respectively.

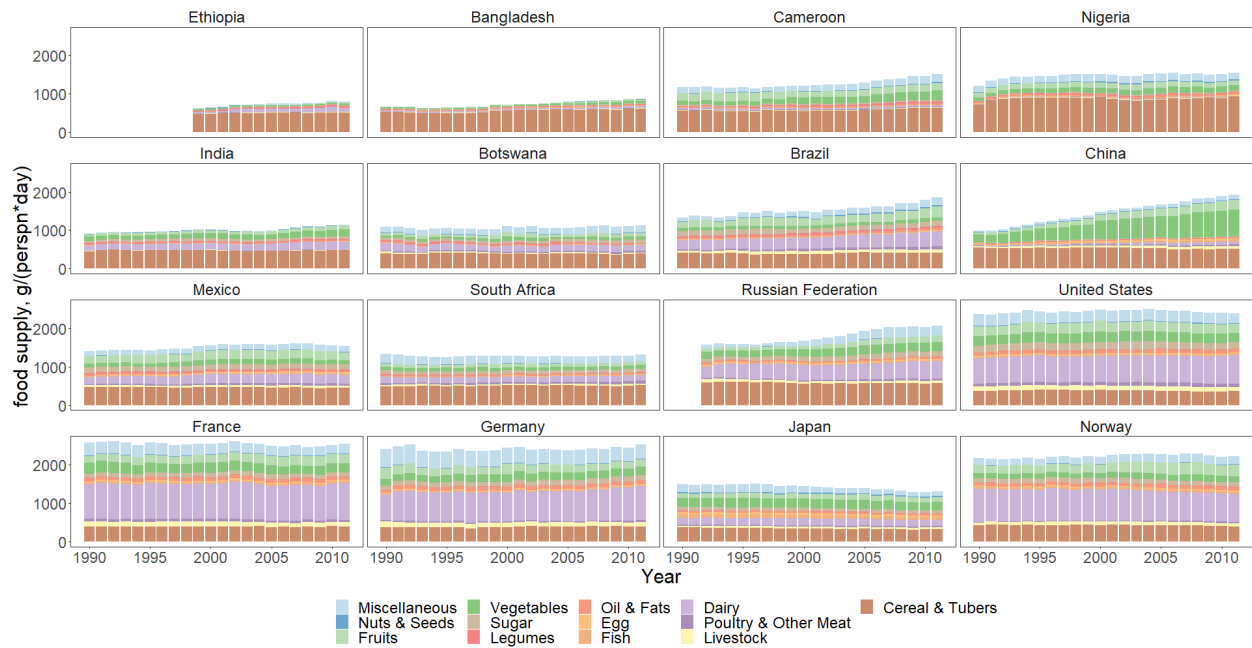

**Figure S2** The temporal change of per capita food supply in selected countries. Data are not available for all the countries during 1990-2011 (e.g. the statistics are lacking in 1990 for Russian Federation) and thus present absence in some cases.

Table S1 Regression results of the health-environment efficiency on SDI, GHG emissions

|                                | (1)              | (2)                  | (3)                  | (4)                       | (5)               | (6)                  | (7)                  | (8)                  |
|--------------------------------|------------------|----------------------|----------------------|---------------------------|-------------------|----------------------|----------------------|----------------------|
|                                | Efficiency       | Efficiency           | Efficiency           | Efficiency                | Efficiency        | Efficiency           | Efficiency           | Efficiency           |
| SDI                            | 0.023<br>(0.128) | 1.153***<br>(0.194)  | 3.759***<br>(0.453)  | 5.046***<br>(0.935)       | 0.167<br>(0.140)  | 1.122***<br>(0.192)  | 3.856***<br>(0.445)  | 4.907***<br>(1.040)  |
| SDI <sup>2</sup>               |                  | -1.222***<br>(0.196) | -6.005***<br>(0.792) | -<br>10.297***<br>(2.957) |                   | -1.211***<br>(0.208) | -6.184***<br>(0.767) | -9.705***<br>(3.231) |
| SDI <sup>3</sup>               |                  |                      | 2.950***<br>(0.486)  | 8.690**<br>(3.879)        |                   |                      | 3.090***<br>(0.480)  | 7.830*<br>(4.223)    |
| SDI <sup>4</sup>               |                  |                      |                      | -2.677<br>(1.802)         |                   |                      |                      | -2.219<br>(1.947)    |
| HAQ                            |                  |                      |                      |                           | -0.002<br>(0.001) | 0.000<br>(0.001)     | 0.000<br>(0.001)     | 0.000<br>(0.001)     |
| Fixed effect                   |                  |                      |                      |                           |                   |                      |                      |                      |
| Country                        | Y                | Y                    | Y                    | Y                         | Y                 | Y                    | Y                    | Y                    |
| Year                           | Y                | Y                    | Y                    | Y                         | Y                 | Y                    | Y                    | Y                    |
| N                              | 2816             | 2816                 | 2816                 | 2816                      | 624               | 624                  | 624                  | 624                  |
| Within R <sup>2</sup>          | 0.000            | 0.189                | 0.274                | 0.279                     | 0.011             | 0.204                | 0.311                | 0.314                |
| Adjusted within R <sup>2</sup> | -0.000           | 0.188                | 0.274                | 0.277                     | 0.006             | 0.199                | 0.305                | 0.307                |
| AIC                            | -<br>12040.573   | -<br>12627.072       | -<br>12939.633       | -<br>12953.512            | -2630.058         | -2764.186            | -2851.882            | -2852.755            |
| BIC                            | -<br>12034.630   | -<br>12615.186       | -<br>12921.804       | -<br>12929.740            | -2621.185         | -2750.878            | -2834.137            | -2830.574            |

Notes: Standard errors in parentheses are clustered to the country level. Two-sided t-tests are performed for hypothesis tests. \* p<0.1, \*\* p<0.05, \*\*\* p<0.01. Since HAQ is only available for limited years, the sample size is smaller for column 5-8. The within R<sup>2</sup> and adjusted within R<sup>2</sup> are reported which captures the goodness of fit of the regressors excluding the country and year fixed effects.

Table S2 Regression results of the health-environment efficiency on SDI, water withdrawal

|                       | (1)              | (2)                  | (3)                  | (4)                  | (5)                | (6)                  | (7)                  | (8)                  |
|-----------------------|------------------|----------------------|----------------------|----------------------|--------------------|----------------------|----------------------|----------------------|
|                       | Efficiency       | Efficiency           | Efficiency           | Efficiency           | Efficiency         | Efficiency           | Efficiency           | Efficiency           |
| SDI                   | 0.178<br>(0.112) | 1.350***<br>(0.170)  | 3.581***<br>(0.379)  | 4.617***<br>(0.803)  | 0.262**<br>(0.114) | 1.263***<br>(0.157)  | 3.559***<br>(0.377)  | 4.299***<br>(0.861)  |
| SDI <sup>2</sup>      |                  | -1.268***<br>(0.169) | -5.362***<br>(0.646) | -8.817***<br>(2.497) |                    | -1.270***<br>(0.169) | -5.448***<br>(0.646) | -7.928***<br>(2.672) |
| SDI <sup>3</sup>      |                  |                      | 2.526***<br>(0.379)  | 7.146**<br>(3.231)   |                    |                      | 2.596***<br>(0.388)  | 5.934*<br>(3.488)    |
| SDI <sup>4</sup>      |                  |                      |                      | -2.155<br>(1.479)    |                    |                      |                      | -1.563<br>(1.614)    |
| HAQ                   |                  |                      |                      |                      | -0.001<br>(0.001)  | 0.001<br>(0.001)     | 0.001<br>(0.001)     | 0.001<br>(0.001)     |
| Fixed effect          |                  |                      |                      |                      |                    |                      |                      |                      |
| Country               | Y                | Y                    | Y                    | Y                    | Y                  | Y                    | Y                    | Y                    |
| Year                  | Y                | Y                    | Y                    | Y                    | Y                  | Y                    | Y                    | Y                    |
| N                     | 2816             | 2816                 | 2816                 | 2816                 | 624                | 624                  | 624                  | 624                  |
| Within R <sup>2</sup> | 0.010            | 0.292                | 0.379                | 0.382                | 0.018              | 0.309                | 0.411                | 0.413                |

|                                |            |            |            |            |           |           |           |           |
|--------------------------------|------------|------------|------------|------------|-----------|-----------|-----------|-----------|
| Adjusted within R <sup>2</sup> | 0.010      | 0.291      | 0.378      | 0.382      | 0.014     | 0.305     | 0.406     | 0.407     |
| AIC                            | -12991.229 | -13930.946 | -14298.892 | -14313.564 | -2827.846 | -3044.836 | -3142.880 | -3143.151 |
| BIC                            | -12985.286 | -13919.060 | -14281.062 | -14289.791 | -2818.974 | -3031.528 | -3125.135 | -3120.971 |

Notes: Standard errors in parentheses are clustered to the country level. Two-sided t-tests are performed for hypothesis tests. \* p<0.1, \*\* p<0.05, \*\*\* p<0.01. Since HAQ is only available for limited years, the sample size is smaller for column 5-8. The within R<sup>2</sup> and adjusted within R<sup>2</sup> are reported which captures the goodness of fit of the regressors excluding the country and year fixed effects.

Table S3 Regression results of the health-environment efficiency on SDI, acidifying emissions

|                                | (1)              | (2)                  | (3)                  | (4)                  | (5)               | (6)                  | (7)                  | (8)                  |
|--------------------------------|------------------|----------------------|----------------------|----------------------|-------------------|----------------------|----------------------|----------------------|
|                                | Efficiency       | Efficiency           | Efficiency           | Efficiency           | Efficiency        | Efficiency           | Efficiency           | Efficiency           |
| SDI                            | 0.043<br>(0.125) | 1.283***<br>(0.198)  | 4.164***<br>(0.425)  | 5.023***<br>(0.906)  | 0.166<br>(0.134)  | 1.218***<br>(0.191)  | 4.214***<br>(0.430)  | 4.900***<br>(0.991)  |
| SDI <sup>2</sup>               |                  | -1.341***<br>(0.198) | -6.626***<br>(0.732) | -9.494***<br>(2.866) |                   | -1.335***<br>(0.208) | -6.785***<br>(0.728) | -9.084***<br>(3.077) |
| SDI <sup>3</sup>               |                  |                      | 3.260***<br>(0.441)  | 7.095*<br>(3.745)    |                   |                      | 3.386***<br>(0.447)  | 6.482<br>(4.005)     |
| SDI <sup>4</sup>               |                  |                      |                      | -1.788<br>(1.726)    |                   |                      |                      | -1.450<br>(1.838)    |
| HAQ                            |                  |                      |                      |                      | -0.001<br>(0.001) | 0.001<br>(0.001)     | 0.001<br>(0.001)     | 0.001<br>(0.001)     |
| Fixed effect                   |                  |                      |                      |                      |                   |                      |                      |                      |
| Country                        | Y                | Y                    | Y                    | Y                    | Y                 | Y                    | Y                    | Y                    |
| Year                           | Y                | Y                    | Y                    | Y                    | Y                 | Y                    | Y                    | Y                    |
| N                              | 2816             | 2816                 | 2816                 | 2816                 | 624               | 624                  | 624                  | 624                  |
| Within R <sup>2</sup>          | 0.000            | 0.254                | 0.371                | 0.373                | 0.009             | 0.262                | 0.399                | 0.401                |
| Adjusted within R <sup>2</sup> | 0.000            | 0.253                | 0.370                | 0.372                | 0.005             | 0.258                | 0.394                | 0.395                |
| AIC                            | -                | -                    | -                    | -                    | -                 | -                    | -                    | -                    |
|                                | 12350.800        | 13171.186            | 13648.917            | 13656.023            | -2673.597         | -2855.565            | -2982.067            | -2981.576            |
| BIC                            | -                | -                    | -                    | -                    | -                 | -                    | -                    | -                    |
|                                | 12344.857        | 13159.300            | 13631.088            | 13632.250            | -2664.725         | -2842.257            | -2964.323            | -2959.395            |

Notes: Standard errors in parentheses are clustered to the country level. Two-sided t-tests are performed for hypothesis tests. \* p<0.1, \*\* p<0.05, \*\*\* p<0.01. Since HAQ is only available for limited years, the sample size is smaller for column 5-8. The within R<sup>2</sup> and adjusted within R<sup>2</sup> are reported which captures the goodness of fit of the regressors excluding the country and year fixed effects.

Table S4 Regression results of the health-environment efficiency on SDI, eutrophying emissions

|                  | (1)              | (2)                  | (3)                  | (4)                  | (5)              | (6)                  | (7)                  | (8)                  |
|------------------|------------------|----------------------|----------------------|----------------------|------------------|----------------------|----------------------|----------------------|
|                  | Efficiency       | Efficiency           | Efficiency           | Efficiency           | Efficiency       | Efficiency           | Efficiency           | Efficiency           |
| SDI              | 0.017<br>(0.131) | 1.185***<br>(0.198)  | 3.841***<br>(0.441)  | 4.589***<br>(0.914)  | 0.136<br>(0.140) | 1.138***<br>(0.190)  | 3.830***<br>(0.433)  | 4.592***<br>(0.993)  |
| SDI <sup>2</sup> |                  | -1.264***<br>(0.196) | -6.136***<br>(0.773) | -8.631***<br>(2.871) |                  | -1.271***<br>(0.203) | -6.169***<br>(0.749) | -8.722***<br>(3.083) |
| SDI <sup>3</sup> |                  |                      | 3.006***<br>(0.471)  | 6.342*<br>(3.730)    |                  |                      | 3.043***<br>(0.463)  | 6.481<br>(4.012)     |
| SDI <sup>4</sup> |                  |                      |                      | -1.556<br>(1.716)    |                  |                      |                      | -1.610<br>(1.842)    |

|                                |            |            |            |            |                   |                  |                  |                  |
|--------------------------------|------------|------------|------------|------------|-------------------|------------------|------------------|------------------|
| HAQ                            |            |            |            |            | -0.002<br>(0.001) | 0.001<br>(0.001) | 0.000<br>(0.001) | 0.000<br>(0.001) |
| Fixed effect                   |            |            |            |            |                   |                  |                  |                  |
| Country                        | Y          | Y          | Y          | Y          | Y                 | Y                | Y                | Y                |
| Year                           | Y          | Y          | Y          | Y          | Y                 | Y                | Y                | Y                |
| N                              | 2816       | 2816       | 2816       | 2816       | 624               | 624              | 624              | 624              |
| Within R <sup>2</sup>          | 0.000      | 0.204      | 0.294      | 0.295      | 0.009             | 0.227            | 0.332            | 0.333            |
| Adjusted within R <sup>2</sup> | -0.000     | 0.203      | 0.293      | 0.294      | 0.005             | 0.222            | 0.326            | 0.326            |
| AIC                            | -12070.502 | -12709.721 | -13045.422 | -13048.981 | -2640.030         | -2792.656        | -2881.790        | -2881.374        |
| BIC                            | -12064.559 | -12697.835 | -13027.593 | -13025.209 | -2631.157         | -2779.348        | -2864.045        | -2859.193        |

Notes: Standard errors in parentheses are clustered to the country level. Two-sided t-tests are performed for hypothesis tests. \* p<0.1, \*\* p<0.05, \*\*\* p<0.01. Since HAQ is only available for limited years, the sample size is smaller for column 5-8. The within R<sup>2</sup> and adjusted within R<sup>2</sup> are reported which captures the goodness of fit of the regressors excluding the country and year fixed effects.

Table S5 Regression results of the health-environment efficiency on lagged SDI, GHG emissions

|                                | (1)              | (2)                  | (3)                  | (4)                   | (5)              | (6)                  | (7)                  | (8)                 |
|--------------------------------|------------------|----------------------|----------------------|-----------------------|------------------|----------------------|----------------------|---------------------|
|                                | Efficiency       | Efficiency           | Efficiency           | Efficiency            | Efficiency       | Efficiency           | Efficiency           | Efficiency          |
| SDI                            | 0.028<br>(0.125) | 1.120***<br>(0.197)  | 3.860***<br>(0.466)  | 5.404***<br>(0.948)   | 0.018<br>(0.161) | 1.038***<br>(0.206)  | 4.117***<br>(0.486)  | 4.852***<br>(1.238) |
| SDI <sup>2</sup>               |                  | -1.157***<br>(0.196) | -6.209***<br>(0.814) | -11.367***<br>(2.991) |                  | -1.202***<br>(0.215) | -6.843***<br>(0.879) | -9.290**<br>(3.806) |
| SDI <sup>3</sup>               |                  |                      | 3.113***<br>(0.501)  | 10.034**<br>(3.928)   |                  |                      | 3.496***<br>(0.549)  | 6.771<br>(4.917)    |
| SDI <sup>4</sup>               |                  |                      |                      | -3.236*<br>(1.827)    |                  |                      |                      | -1.526<br>(2.260)   |
| HAQ                            |                  |                      |                      |                       | 0.000<br>(0.001) | 0.002<br>(0.001)     | 0.001<br>(0.001)     | 0.001<br>(0.001)    |
| Fixed effect                   |                  |                      |                      |                       |                  |                      |                      |                     |
| Country                        | Y                | Y                    | Y                    | Y                     | Y                | Y                    | Y                    | Y                   |
| Year                           | Y                | Y                    | Y                    | Y                     | Y                | Y                    | Y                    | Y                   |
| N                              | 2718             | 2718                 | 2718                 | 2718                  | 526              | 526                  | 526                  | 526                 |
| Within R <sup>2</sup>          | 0.000            | 0.168                | 0.262                | 0.268                 | 0.000            | 0.181                | 0.308                | 0.309               |
| Adjusted within R <sup>2</sup> | -0.000           | 0.167                | 0.261                | 0.267                 | -0.005           | 0.175                | 0.300                | 0.300               |
| AIC                            | -11761.399       | -12259.041           | -12582.774           | -12602.259            | -2364.155        | -2467.306            | -2553.467            | -2552.532           |
| BIC                            | -11755.492       | -12247.226           | -12565.051           | -12578.628            | -2355.624        | -2454.511            | -2536.406            | -2531.206           |

Notes: Standard errors in parentheses are clustered to the country level. Two-sided t-tests are performed for hypothesis tests. \* p<0.1, \*\* p<0.05, \*\*\* p<0.01. Since HAQ is only available for limited years, the sample size is smaller for column 5-8. The within R<sup>2</sup> and adjusted within R<sup>2</sup> are reported which captures the goodness of fit of the regressors excluding the country and year fixed effects.

Table S6 Regression results of the health-environment efficiency on lagged SDI, water withdrawal

|                                | (1)              | (2)                  | (3)                  | (4)                  | (5)              | (6)                  | (7)                  | (8)                  |
|--------------------------------|------------------|----------------------|----------------------|----------------------|------------------|----------------------|----------------------|----------------------|
|                                | Efficiency       | Efficiency           | Efficiency           | Efficiency           | Efficiency       | Efficiency           | Efficiency           | Efficiency           |
| SDI                            | 0.170<br>(0.110) | 1.326***<br>(0.175)  | 3.700***<br>(0.386)  | 4.989***<br>(0.800)  | 0.074<br>(0.135) | 1.150***<br>(0.190)  | 3.898***<br>(0.417)  | 4.642***<br>(0.961)  |
| SDI <sup>2</sup>               |                  | -1.224***<br>(0.172) | -5.601***<br>(0.655) | -9.909***<br>(2.495) |                  | -1.268***<br>(0.195) | -6.303***<br>(0.778) | -8.778***<br>(3.034) |
| SDI <sup>3</sup>               |                  |                      | 2.698***<br>(0.385)  | 8.476***<br>(3.242)  |                  |                      | 3.120***<br>(0.492)  | 6.433<br>(4.031)     |
| SDI <sup>4</sup>               |                  |                      |                      | -2.702*<br>(1.490)   |                  |                      |                      | -1.544<br>(1.911)    |
| HAQ                            |                  |                      |                      |                      | 0.001<br>(0.001) | 0.002***<br>(0.001)  | 0.002**<br>(0.001)   | 0.002**<br>(0.001)   |
| Fixed effect                   |                  |                      |                      |                      |                  |                      |                      |                      |
| Country                        | Y                | Y                    | Y                    | Y                    | Y                | Y                    | Y                    | Y                    |
| Year                           | Y                | Y                    | Y                    | Y                    | Y                | Y                    | Y                    | Y                    |
| N                              | 2718             | 2718                 | 2718                 | 2718                 | 526              | 526                  | 526                  | 526                  |
| Within R <sup>2</sup>          | 0.010            | 0.270                | 0.367                | 0.373                | 0.008            | 0.277                | 0.411                | 0.413                |
| Adjusted within R <sup>2</sup> | 0.009            | 0.269                | 0.366                | 0.372                | 0.003            | 0.271                | 0.405                | 0.405                |
| AIC                            | -12668.118       | -13493.650           | -13881.208           | -13903.371           | -2519.538        | -2683.733            | -2789.660            | -2789.369            |
| BIC                            | -12662.210       | -13481.835           | -13863.485           | -13879.741           | -2511.008        | -2670.937            | -2772.599            | -2768.042            |

Notes: Standard errors in parentheses are clustered to the country level. Two-sided t-tests are performed for hypothesis tests. \* p<0.1, \*\* p<0.05, \*\*\* p<0.01. Since HAQ is only available for limited years, the sample size is smaller for column 5-8. The within R<sup>2</sup> and adjusted within R<sup>2</sup> are reported which captures the goodness of fit of the regressors excluding the country and year fixed effects.

Table S7 Regression results of the health-environment efficiency on lagged SDI, acidifying emissions

|                       | (1)              | (2)                  | (3)                  | (4)                   | (5)               | (6)                  | (7)                  | (8)                 |
|-----------------------|------------------|----------------------|----------------------|-----------------------|-------------------|----------------------|----------------------|---------------------|
|                       | Efficiency       | Efficiency           | Efficiency           | Efficiency            | Efficiency        | Efficiency           | Efficiency           | Efficiency          |
| SDI                   | 0.046<br>(0.121) | 1.250***<br>(0.202)  | 4.291***<br>(0.435)  | 5.383***<br>(0.908)   | -0.006<br>(0.155) | 1.119***<br>(0.210)  | 4.516***<br>(0.467)  | 4.910***<br>(1.169) |
| SDI <sup>2</sup>      |                  | -1.275***<br>(0.200) | -6.881***<br>(0.747) | -10.530***<br>(2.875) |                   | -1.325***<br>(0.220) | -7.551***<br>(0.839) | -8.861**<br>(3.610) |
| SDI <sup>3</sup>      |                  |                      | 3.455***<br>(0.451)  | 8.350**<br>(3.764)    |                   |                      | 3.858***<br>(0.526)  | 5.611<br>(4.670)    |
| SDI <sup>4</sup>      |                  |                      |                      | -2.289<br>(1.739)     |                   |                      |                      | -0.817<br>(2.149)   |
| HAQ                   |                  |                      |                      |                       | 0.001<br>(0.001)  | 0.002**<br>(0.001)   | 0.002*<br>(0.001)    | 0.002*<br>(0.001)   |
| Fixed effect          |                  |                      |                      |                       |                   |                      |                      |                     |
| Country               | Y                | Y                    | Y                    | Y                     | Y                 | Y                    | Y                    | Y                   |
| Year                  | Y                | Y                    | Y                    | Y                     | Y                 | Y                    | Y                    | Y                   |
| N                     | 2718             | 2718                 | 2718                 | 2718                  | 526               | 526                  | 526                  | 526                 |
| Within R <sup>2</sup> | 0.001            | 0.229                | 0.359                | 0.362                 | 0.001             | 0.240                | 0.407                | 0.407               |

| Adjusted within R <sup>2</sup> | 0.000      | 0.229      | 0.358      | 0.361      | -0.004    | 0.234     | 0.401     | 0.400     |
|--------------------------------|------------|------------|------------|------------|-----------|-----------|-----------|-----------|
| AIC                            | -12071.823 | -12775.838 | -13274.394 | -13286.239 | -2407.407 | -2549.090 | -2677.511 | -2675.897 |
| BIC                            | -12065.915 | -12764.022 | -13256.671 | -13262.609 | -2398.877 | -2536.294 | -2660.449 | -2654.570 |

Notes: Standard errors in parentheses are clustered to the country level. Two-sided t-tests are performed for hypothesis tests. \* p<0.1, \*\* p<0.05, \*\*\* p<0.01. Since HAQ is only available for limited years, the sample size is smaller for column 5-8. The within R<sup>2</sup> and adjusted within R<sup>2</sup> are reported which captures the goodness of fit of the regressors excluding the country and year fixed effects.

Table S8 Regression results of the health-environment efficiency on lagged SDI, eutrophying emissions

|                                | (1)              | (2)                  | (3)                  | (4)                  | (5)               | (6)                  | (7)                  | (8)                 |
|--------------------------------|------------------|----------------------|----------------------|----------------------|-------------------|----------------------|----------------------|---------------------|
|                                | Efficiency       | Efficiency           | Efficiency           | Efficiency           | Efficiency        | Efficiency           | Efficiency           | Efficiency          |
| SDI                            | 0.028<br>(0.127) | 1.150***<br>(0.203)  | 3.970***<br>(0.455)  | 4.957***<br>(0.925)  | -0.007<br>(0.165) | 1.035***<br>(0.212)  | 4.132***<br>(0.474)  | 4.792***<br>(1.164) |
| SDI <sup>2</sup>               |                  | -1.188***<br>(0.199) | -6.388***<br>(0.797) | -9.684***<br>(2.902) |                   | -1.227***<br>(0.221) | -6.903***<br>(0.859) | -9.099**<br>(3.584) |
| SDI <sup>3</sup>               |                  |                      | 3.205***<br>(0.487)  | 7.627**<br>(3.772)   |                   |                      | 3.517***<br>(0.534)  | 6.456<br>(4.616)    |
| SDI <sup>4</sup>               |                  |                      |                      | -2.068<br>(1.738)    |                   |                      |                      | -1.369<br>(2.112)   |
| HAQ                            |                  |                      |                      |                      | 0.000<br>(0.001)  | 0.002<br>(0.001)     | 0.001<br>(0.001)     | 0.001<br>(0.001)    |
| Fixed effect                   |                  |                      |                      |                      |                   |                      |                      |                     |
| Country                        | Y                | Y                    | Y                    | Y                    | Y                 | Y                    | Y                    | Y                   |
| Year                           | Y                | Y                    | Y                    | Y                    | Y                 | Y                    | Y                    | Y                   |
| N                              | 2718             | 2718                 | 2718                 | 2718                 | 526               | 526                  | 526                  | 526                 |
| Within R <sup>2</sup>          | 0.000            | 0.179                | 0.280                | 0.282                | 0.000             | 0.194                | 0.324                | 0.326               |
| Adjusted within R <sup>2</sup> | -0.000           | 0.179                | 0.279                | 0.281                | -0.005            | 0.187                | 0.317                | 0.317               |
| AIC                            | -11792.761       | -12327.368           | -12681.174           | -12688.247           | -2375.986         | -2486.963            | -2578.021            | -2576.919           |
| BIC                            | -11786.854       | -12315.553           | -12663.451           | -12664.617           | -2367.455         | -2474.167            | -2560.960            | -2555.593           |

Notes: Standard errors in parentheses are clustered to the country level. Two-sided t-tests are performed for hypothesis tests. \* p<0.1, \*\* p<0.05, \*\*\* p<0.01. Since HAQ is only available for limited years, the sample size is smaller for column 5-8. The within R<sup>2</sup> and adjusted within R<sup>2</sup> are reported which captures the goodness of fit of the regressors excluding the country and year fixed effects.

Table S9 Results of spline regression with 2 splines

|                   | (1)                       | (2)                          | (3)                              | (4)                               |
|-------------------|---------------------------|------------------------------|----------------------------------|-----------------------------------|
|                   | Efficiency, GHG emissions | Efficiency, water withdrawal | Efficiency, acidifying emissions | Efficiency, eutrophying emissions |
| sdi_index_value_1 | 0.442***<br>(0.136)       | 0.586***<br>(0.121)          | 0.496***<br>(0.140)              | 0.451***<br>(0.136)               |
| sdi_index_value_2 | -0.812***<br>(0.126)      | -0.792***<br>(0.117)         | -0.878***<br>(0.133)             | -0.842***<br>(0.126)              |
| Fixed effect      |                           |                              |                                  |                                   |



| Country                        | Y          | Y          | Y          | Y          |
|--------------------------------|------------|------------|------------|------------|
| Year                           | Y          | Y          | Y          | Y          |
| N                              | 2816       | 2816       | 2816       | 2816       |
| Within R <sup>2</sup>          | 0.182      | 0.250      | 0.238      | 0.198      |
| Adjusted within R <sup>2</sup> | 0.181      | 0.250      | 0.237      | 0.197      |
| AIC                            | -12603.851 | -13772.007 | -13111.952 | -12688.238 |
| BIC                            | -12591.965 | -13760.120 | -13100.066 | -12676.352 |

Notes: Linear splines are adopted without penalty. Standard errors in parentheses are clustered to the country level. Two-sided t-tests are performed for hypothesis tests. \* p<0.1, \*\* p<0.05, \*\*\* p<0.01. The within R<sup>2</sup> and adjusted within R<sup>2</sup> are reported which captures the goodness of fit of the regressors excluding the country and year fixed effects.
